# Supplementary material
Source: publisher figshare collection journal article supplement (https://acs.figshare.com/ndownloader/files/5159389)
Supplement: Supplementary file 1 [file 5159389]

## Supporting Information

# Stereoselective Synthesis of P-Chiral Phosphorus Compounds From *N*-*t*-Butoxycarbonyl Amino Acids

William H. Hersh,<sup>\*†</sup> Lauren Klein,<sup>†</sup> and Louis J. Todaro<sup>§</sup>

<sup>†</sup>Department of Chemistry and Biochemistry, Queens College and the Graduate Center of the City University of New York, Flushing, NY 11367-1597, and <sup>§</sup>Department of Chemistry, Hunter College, New York, NY 10021

william\_hersh@qc.edu

## Table of Contents

| Page | Content                                                                           | Page | Content                           |
|------|-----------------------------------------------------------------------------------|------|-----------------------------------|
| S1   | General                                                                           | S7   | IR of <b>7</b> .                  |
| S2   | Synthesis of compound <b>7</b>                                                    | S8   | <sup>1</sup> H NMR of <b>8</b>    |
| S2   | Synthesis of compound <b>8</b>                                                    | S9   | <sup>31</sup> P NMR of <b>8</b> . |
| S2   | Information on compound <b>9</b>                                                  | S10  | <sup>13</sup> C NMR of <b>8</b> . |
| S2   | Information on variable temperature NMR spectra                                   | S11  | IR of <b>8</b> .                  |
| S3   | Table 1. Comparison of Bond Lengths (Å) and Angles (°) in <b>2</b> and <b>9</b> . | S12  | <sup>1</sup> H NMR of <b>9</b>    |
| S3   | Table 2. Variable temperature NMR data.                                           | S13  | <sup>31</sup> P NMR of <b>9</b> . |
| S4   | <sup>1</sup> H NMR of <b>7</b>                                                    | S14  | <sup>13</sup> C NMR of <b>9</b> . |
| S5   | <sup>31</sup> P NMR of <b>7</b> .                                                 | S15  | IR of <b>9</b> .                  |
| S6   | <sup>13</sup> C NMR of <b>7</b> .                                                 |      |                                   |

**General .** All manipulations of air-sensitive compounds were carried out in an inert atmosphere glovebox under recirculating nitrogen. <sup>1</sup>H, <sup>13</sup>C, and <sup>31</sup>P NMR spectra were recorded at 400, 100, and 160 MHz, respectively; chemical shifts are reported relative to TMS for <sup>1</sup>H and <sup>13</sup>C NMR, and to external 85% H<sub>3</sub>PO<sub>4</sub> at 0 ppm (positive values downfield) for <sup>31</sup>P NMR. Infrared spectra were obtained in 0.1 mm NaCl solution cells on a computer-controlled FT-IR spectrometer. Optical rotations were measured at room temperature in a 1.0 dm cell.

All solvents were treated under nitrogen. Benzene and tetrahydrofuran were distilled from sodium benzophenone ketyl. Hexane was purified by washing successively with 5% nitric acid in sulfuric acid, water, sodium bicarbonate solution, and water, and then dried over calcium chloride and distilled from *n*-butyllithium in hexane. CDCl<sub>3</sub> was vacuum-transferred from phosphorus pentoxide. Silica gel (200-400 mesh) was dried for several hours under vacuum while heating with a heat gun and was transferred under vacuum into the glovebox. PhPCl<sub>2</sub> was degassed prior to use, NEt<sub>3</sub> was distilled from CaH<sub>2</sub>, and *t*-Boc amino acids were used as received.

**(2R, 4S)-3-*tert*-butyloxycarbonyl-5-oxo-2-phenyl-1,3,2-oxazaphospholidine (7).** In the glovebox, *t*-Boc glycine (2.00g, 11.2 mmol) was dissolved in 3 mL of THF, and the solvent was removed under vacuum in order to remove any water that might be present. It was then redissolved in 40 mL of THF, NEt<sub>3</sub> (2.36 g, 24.4 mmol) was added in ~1 mL of THF, and then a solution of 2.18 g (12.2 mmol) of PhPCl<sub>2</sub> in 10 mL of THF was added dropwise over 5 min to the stirred solution, immediately giving a white precipitate. An aliquot taken for <sup>31</sup>P NMR showed complete conversion to product, but stirring was still allowed to continue overnight. The mixture was filtered through a short column of silica gel (filling 30 mL of a 60 mL fritted funnel), washed with THF, and the solvent removed to give 2.12 g crude product (66% yield) that was close to spectroscopically pure. This was crystallized by dissolving in 2 mL of CH<sub>2</sub>Cl<sub>2</sub>, cooling at –30 °C, layering on an equal volume of hexanes, and cooling overnight to give 0.78 g of fine white crystals; a second crop of 0.55 g was obtained in the same way (41% total yield). IR (CHCl<sub>3</sub>): 1797 (s), 1713 (s) cm<sup>-1</sup>; <sup>1</sup>H NMR (CDCl<sub>3</sub>): δ 7.50 (m, 5H), 4.23 (br dd, <sup>3</sup>J<sub>PH</sub> = 4.9 Hz, <sup>2</sup>J<sub>HH</sub> = 17.8 Hz, 1H), 3.95 (dd, <sup>3</sup>J<sub>PH</sub> = 1.4 Hz, <sup>2</sup>J<sub>HH</sub> = 17.8 Hz, 1H) 1.45 (s, 9H). <sup>31</sup>P NMR (CDCl<sub>3</sub>): 135.2 ppm. <sup>13</sup>C NMR (CDCl<sub>3</sub>): 170.8 (br s), 152.4 (br s), 139.37 (d, J<sub>PC</sub> = 43.3 Hz), 132.2, 129.2 (d, J<sub>PC</sub> = 23.8 Hz), 129.0 (d, J<sub>PC</sub> = 6.3 Hz), 83.1, 42.8 (br s), 28.2 ppm. Anal. Calcd for C<sub>13</sub>H<sub>16</sub>NO<sub>4</sub>P: C, 55.52; H, 5.73; N, 4.98. Found: C, 55.79; H, 5.91; N, 4.78.

**(2R, 4S)-3-*tert*-butyloxycarbonyl-4-methyl-5-oxo-2-phenyl-1,3,2-oxazaphospholidine (8).** In the glovebox, *t*-Boc alanine (2.00g, 10.6 mmol) was dissolved in 3 mL of THF, and the solvent was removed under vacuum in order to remove any water that might be present. It was then redissolved in 40 mL of THF, NEt<sub>3</sub> (2.11 g, 20.8 mmol) was added in ~1 mL of THF, and then a solution of 1.89 g (10.6 mmol) of PhPCl<sub>2</sub> in 10 mL of THF was added dropwise over 5 min to the stirred solution, immediately giving a white precipitate. The mixture was filtered through a short column of silica gel (filling 30 mL of a 60 mL fritted funnel), washed with THF, and the solvent removed to give 2.66 g of spectroscopically pure crude product (85% yield). This was dissolved in ~2 mL of ether, cooled to –30 °C, and then 2 ml of hexanes was layed on and the mixture allowed to stand at –30 °C overnight to give 0.68 g of fine white crystals; a second crop of 0.45 g was obtained in the same way (36% total yield). [α]<sub>D</sub><sup>26</sup> = 372.8 (c = 2.485, C<sub>6</sub>H<sub>6</sub>); IR (CHCl<sub>3</sub>): 1787 (s), 1712 (s), 1678 (m) cm<sup>-1</sup>; <sup>1</sup>H NMR (CDCl<sub>3</sub>): δ 7.55 (m, 3H), 7.47 (m, 2H), 4.43 (br s, 1H), 1.70 (d, <sup>3</sup>J<sub>HH</sub> = 6.8 Hz, 3H), 1.29 (s, 9H). <sup>31</sup>P NMR (CDCl<sub>3</sub>): 134.6 ppm. <sup>13</sup>C NMR (CDCl<sub>3</sub>): 173.5 (br s), 152.1 (br s), 139.8 (d, J<sub>PC</sub> = 49.1 Hz), 132.6, 130.1 (d, J<sub>PC</sub> = 26.1 Hz), 128.9 (d, J<sub>PC</sub> = 7.1 Hz), 82.9, 50.4, 28.0, 18.3 ppm. Anal. Calcd for C<sub>14</sub>H<sub>18</sub>NO<sub>4</sub>P: C, 56.95; H, 6.14; N, 4.74. Found: C, 56.84; H, 6.19; N, 4.79.

**(2R, 4S)-3-*tert*-butyloxycarbonyl-4-isopropyl-5-oxo-2-phenyl-1,3,2-oxazaphospholidine (9).** The synthetic details may be found in the published Note. Details of the structure determination may be found in the cif file, and comparison of selected bond lengths and angles to *cis*-3-toluenesulfonyl-5-oxo-2-phenyl-1,3,2-oxazaphospholidine (**2**) may be found in Table 1.

**Variable temperature NMR spectra.** Data collected as described in the published Note may be found in Table 2.

**Table 1.** Comparison of Bond Lengths (Å) and Angles (°) in **2** and **9**.

|                                     | <b>2</b>  | <b>9</b>  |
|-------------------------------------|-----------|-----------|
| P-O <sub>ring</sub>                 | 1.678 (3) | 1.643 (6) |
| P-N                                 | 1.744 (4) | 1.753 (6) |
| P-Ph                                | 1.824 (5) | 1.831 (8) |
| O <sub>ring</sub> -C                | 1.367 (6) | 1.372 (9) |
| N-C <sub>ring</sub>                 | 1.475 (6) | 1.439 (9) |
| O <sub>ring</sub> -P-N              | 90.9 (2)  | 88.7 (3)  |
| O <sub>ring</sub> -P-Ph             | 101.1 (2) | 100.5 (3) |
| N-P-Ph                              | 99.9 (2)  | 102.0 (3) |
| P-N-C <sub>ring</sub>               | 112.5 (3) | 116.1 (4) |
| P-N-R <sup>a</sup>                  | 118.4 (2) | 120.1 (5) |
| C <sub>ring</sub> -N-R <sup>a</sup> | 120.0 (3) | 122.7 (6) |
| ΣN <sup>b</sup>                     | 350.9     | 358.9     |

<sup>a</sup>R' = non-ring substituent on nitrogen. <sup>b</sup>sum of the three angles at nitrogen.

**Table 2.** Variable temperature NMR data

|    | A                          | B            | C             | D                              | E                                  | F                              | G                                  | H            | I          | J            | K                           | L            | M             | N            | O                                  | P             | Q            |
|----|----------------------------|--------------|---------------|--------------------------------|------------------------------------|--------------------------------|------------------------------------|--------------|------------|--------------|-----------------------------|--------------|---------------|--------------|------------------------------------|---------------|--------------|
| 1  | <b>Compound 7</b>          |              |               |                                |                                    |                                |                                    |              |            |              |                             |              |               |              |                                    |               |              |
| 2  | T                          | 31P integral | t-Bu integral | calcd 1/K                      | all chem. shift differences in ppm |                                |                                    |              | cis-CHN    | TMS          | k(t-Bu) (s-1)               | k(CHN) (s-1) |               |              |                                    |               |              |
| 3  |                            | K(31P)       | K(t-Bu)       | for gNMR                       | t-Bu chem                          | extrapolated                   | shift diff                         | extrapolated | shift diff | v(1/2) (Hz)  |                             |              |               |              |                                    |               |              |
| 4  | -30                        | 4.3524       | 9.2424        | 0.2358                         | 0.05689                            | 0.05792                        | 0.050965                           | 0.05097      | 1.624      | 0.1 ± 0.1    | 0.05 ± 0.05                 |              |               |              |                                    |               |              |
| 5  | -20                        | 3.6333       | 3.9745        | 0.2561                         | 0.0581                             | 0.05705                        | 0.056475                           | 0.05648      | 1.867      | 0.7 ± 0.1    | 0.4 ± 0.2                   |              |               |              |                                    |               |              |
| 6  | -10                        |              | 3.7230        | 0.2763                         | 0.05717                            | 0.05618                        |                                    | 0.05199      | 1.218      | 4 ± 1        | 4 ± 1                       |              |               |              |                                    |               |              |
| 7  | 0                          |              |               | 0.2866                         | 0.0543                             | 0.05531                        |                                    | 0.06750      | 1.508      | 7 ± 1        | 7 ± 1                       |              |               |              |                                    |               |              |
| 8  | 10                         |              |               | 0.3167                         | 0.0544                             | 0.05357                        |                                    | 0.07301      | 1.276      | 21 ± 1       | 22 ± 2                      |              |               |              |                                    |               |              |
| 9  | 20                         |              |               | 0.3366                         | 0.0537                             | 0.05277                        |                                    | 0.07852      | 1.508      | 55 ± 5       | 70 ± 20                     |              |               |              |                                    |               |              |
| 10 | 30                         |              |               | 0.3564                         | 0.0527                             | 0.05183                        |                                    | 0.08403      | 1.16       | 150 ± 10     |                             |              |               |              |                                    |               |              |
| 11 | 40                         |              |               | 0.3760                         | 0.05183                            | 0.050954                       |                                    | 0.08954      | 1.043      | 300 ± 20     |                             |              |               |              |                                    |               |              |
| 12 | 50                         |              |               | 0.3954                         | 0.05096                            | 0.05009                        |                                    | 0.09505      | 0.966      | 600 ± 20     |                             |              |               |              |                                    |               |              |
| 13 | 60                         |              |               | 0.4144                         | 0.05009                            |                                |                                    | 0.10056      | 1.218      | 1100 ± 100   |                             |              |               |              |                                    |               |              |
| 14 | <b>K = [major]/[minor]</b> |              |               |                                |                                    |                                |                                    |              |            |              |                             |              |               |              |                                    |               |              |
| 15 |                            |              |               | For chem. shift extrapolation: |                                    |                                |                                    |              |            |              | <b>k for major to minor</b> |              |               |              |                                    |               |              |
| 16 |                            |              |               | slope =                        |                                    |                                | -8.700E-05                         |              | 5.510E-04  |              |                             |              |               |              |                                    |               |              |
| 17 |                            |              |               | int. =                         |                                    |                                | 0.05531                            |              | 0.06750    |              |                             |              |               |              |                                    |               |              |
| 18 | <b>Compound 8</b>          |              |               |                                |                                    |                                |                                    |              |            |              |                             |              |               |              |                                    |               |              |
| 19 | T                          | 31P integral | t-Bu integral | CHN integral                   | average K                          | calcd 1/K                      | all chem. shift differences in ppm |              |            |              | CHN                         | TMS          | k(t-Bu) (s-1) | k(CHN) (s-1) |                                    |               |              |
| 20 |                            | K(31P)       | K(t-Bu)       | K(CHN)                         | for gNMR                           | shift diff                     | t-Bu chem                          | extrapolated | shift diff | extrapolated | v(1/2) (Hz)                 |              |               |              |                                    |               |              |
| 21 | -60                        | 8.0588       | 7.5000        | 7.4706                         | 7.6684                             | 0.1341                         | 0.2427                             | 0.2426       | 0.1143     | 0.11555      | 2.4874                      |              |               |              |                                    |               |              |
| 22 | -40                        | 5.9294       | 6.3158        | 6.0476                         | 6.0940                             | 0.1544                         | 0.2305                             | 0.2311       | 0.137      | 0.1345       | 1.7339                      | 0.1 ± 0.1    | 0.5 ± 0.25    |              |                                    |               |              |
| 23 | -20                        |              | 6.1257        | 5.7767                         | 5.9468                             | 0.1738                         | 0.2210                             | 0.2195       | 0.1522     | 0.15345      | 1.7339                      | 1.5 ± 0.5    | 1 ± 0.25      |              |                                    |               |              |
| 24 | -10                        |              |               |                                |                                    | 0.1832                         | 0.2128                             | 0.2138       |            | 0.162925     | 1.3338                      | 5 ± 2        | 5 ± 1         |              |                                    |               |              |
| 25 | 22                         |              |               |                                |                                    | 0.2116                         |                                    | 0.1953       |            | 0.193245     | 1.2758                      | 90 ± 20      | 160 ± 20      |              |                                    |               |              |
| 26 | <b>K = [major]/[minor]</b> |              |               |                                |                                    |                                |                                    |              |            |              |                             |              |               |              |                                    |               |              |
| 27 |                            |              |               |                                |                                    | For chem. shift extrapolation: |                                    |              |            |              | <b>k for major to minor</b> |              |               |              |                                    |               |              |
| 28 |                            |              |               |                                |                                    | slope =                        |                                    |              | -5.776E-04 |              | 9.475E-04                   |              |               |              |                                    |               |              |
| 29 |                            |              |               |                                |                                    | int. =                         |                                    |              | 0.2080     |              | 0.1724                      |              |               |              |                                    |               |              |
| 30 | <b>Compound 9</b>          |              |               |                                |                                    |                                |                                    |              |            |              |                             |              |               |              |                                    |               |              |
| 31 | T                          | 31P integral | t-Bu integral | CHN integral                   | average K                          | calcd 1/K                      | all chem. shift differences in ppm |              |            |              | CHN                         | 31P chem     | 31P           | TMS          | Ph3                                | k(t-Bu) (s-1) | k(CHN) (s-1) |
| 32 |                            | K(31P)       | K(t-Bu)       | K(CHN)                         | for gNMR                           | shift diff                     | t-Bu chem                          | extrapolated | shift diff | extrapolated | shift diff                  | extrapolated | v(1/2) (Hz)   | v(1/2) (Hz)  |                                    |               |              |
| 33 | -40                        | 10.5612      | 11.3750       | 11.6667                        | 11.1826                            | 0.0913                         | 0.2779                             | 0.2780       | 0.1231     | 0.1243       | 0.9080                      | 0.9045       | 2.21          | 2.78         |                                    |               |              |
| 34 | -20                        | 9.1304       | 9.5758        | 9.4904                         | 9.3953                             | 0.1045                         | 0.2633                             | 0.2633       | 0.1408     | 0.1392       | 0.8760                      | 0.8800       | 1.07          | 3.05         | 0.05 ± 0.05                        | 0.2 ± 0.1     | 0.1 ± 0.1    |
| 35 | 0                          | 7.1066       | 8.4870        | 8.6235                         | 8.0178                             | 0.1172                         | 0.2488                             | 0.2486       | 0.1553     | 0.1540       | 0.8500                      | 0.8554       | 1.18          | 2.46         | 0.5 ± 0.4                          | 0.7 ± 0.1     | 1 ± 0.5      |
| 36 | 10                         | 7.8108       | 9.6942        | 8.5030                         | 8.6054                             | 0.1294                         | 0.2412                             | 0.2413       | 0.1598     | 0.1615       | 0.8490                      | 0.8431       | 0.93          | 2.73         | 1.5 ± 0.2                          | 2 ± 0.5       | 1.5 ± 0.5    |
| 37 | 23                         |              |               |                                |                                    | 0.1312                         |                                    | 0.2338       |            | 0.1711       |                             | 0.8271       | 0.88          | 3.16         | 7 ± 1                              | 7 ± 1         | 5 ± 1        |
| 38 | 30                         |              |               |                                |                                    | 0.1353                         |                                    | 0.2267       |            | 0.1763       |                             | 0.8185       | 0.88          | 1.65         | 13 ± 1                             | 12 ± 1        | 9 ± 1        |
| 39 | 40                         |              |               |                                |                                    | 0.1411                         |                                    | 0.2193       |            | 0.1837       |                             | 0.8062       | 0.92          | 1.54         |                                    | 50 ± 10       | 35 ± 5       |
| 40 | 50                         |              |               |                                |                                    | 0.1468                         |                                    | 0.2120       |            | 0.1912       |                             | 0.7940       | 0.82          | 1.54         |                                    | 50 ± 10       | 50 ± 10      |
| 41 | <b>K = [major]/[minor]</b> |              |               |                                |                                    |                                |                                    |              |            |              |                             |              |               |              |                                    |               |              |
| 42 |                            |              |               |                                |                                    | For chem. shift extrapolation: |                                    |              |            |              | <b>k for major to minor</b> |              |               |              |                                    |               |              |
| 43 |                            |              |               |                                |                                    | slope =                        |                                    |              | -7.328E-04 |              | 7.427E-04                   |              | -1.229E-03    |              | (line-width used for calculations) |               |              |
| 44 |                            |              |               |                                |                                    | int. =                         |                                    |              | 0.2486     |              | 0.1540                      |              | 0.8554        |              | is shown above, each is 1 Hz lower |               |              |
| 45 | <b>Compound 10</b>         |              |               |                                |                                    |                                |                                    |              |            |              |                             |              |               |              |                                    |               |              |
| 46 | T                          | CH2          | CH2           | calcd 1/K                      | chem. shift differences in ppm     |                                |                                    |              | CH2 chem   | TMS          | k(CH2) (s-1)                |              |               |              |                                    |               |              |
| 47 |                            | K(CH2)       | K(t-Bu)       | for gNMR                       | CH2 chem                           | extrapolated                   | shift diff                         | extrapolated | shift diff | v(1/2) (Hz)  |                             |              |               |              |                                    |               |              |
| 48 | -20                        | 0.11         | 9.0909        | 0.1100                         | 0.0845                             | 0.0847                         |                                    |              | 1.98       |              |                             |              |               |              |                                    |               |              |
| 49 | -10                        | 0.12         | 8.3333        | 0.1212                         | 0.0845                             | 0.0843                         |                                    |              | 1.65       | 0.2 ± 0.1    |                             |              |               |              |                                    |               |              |
| 50 | 0                          | 0.13         | 7.6923        | 0.1326                         | 0.0840                             | 0.0839                         |                                    |              | 1.88       | 0.6 ± 0.1    |                             |              |               |              |                                    |               |              |
| 51 | 5                          | 0.14         | 7.1429        | 0.1384                         | 0.0835                             | 0.0837                         |                                    |              | 1.65       | 1 ± 0.1      |                             |              |               |              |                                    |               |              |
| 52 | 15                         | 0.15         | 6.6667        | 0.1500                         | 0.0833                             | 0.0833                         |                                    |              | 1.53       | 2.8 ± 0.2    |                             |              |               |              |                                    |               |              |
| 53 | 25                         |              |               | 0.1617                         | 0.0829                             | 0.0829                         |                                    |              | 1.06       | 7 ± 1        |                             |              |               |              |                                    |               |              |
| 54 | 30                         |              |               | 0.1676                         | 0.0827                             | 0.0827                         |                                    |              | 1.00       | 13 ± 1       |                             |              |               |              |                                    |               |              |
| 55 | <b>K = [major]/[minor]</b> |              |               |                                |                                    |                                |                                    |              |            |              |                             |              |               |              |                                    |               |              |
| 56 |                            |              |               | For chem. shift extrapolation: |                                    |                                |                                    |              |            |              | <b>k for major to minor</b> |              |               |              |                                    |               |              |
| 57 |                            |              |               | slope =                        |                                    |                                | -3.8983E-05                        |              |            |              |                             |              |               |              |                                    |               |              |
| 58 |                            |              |               | int. =                         |                                    |                                | 0.08388                            |              |            |              |                             |              |               |              |                                    |               |              |

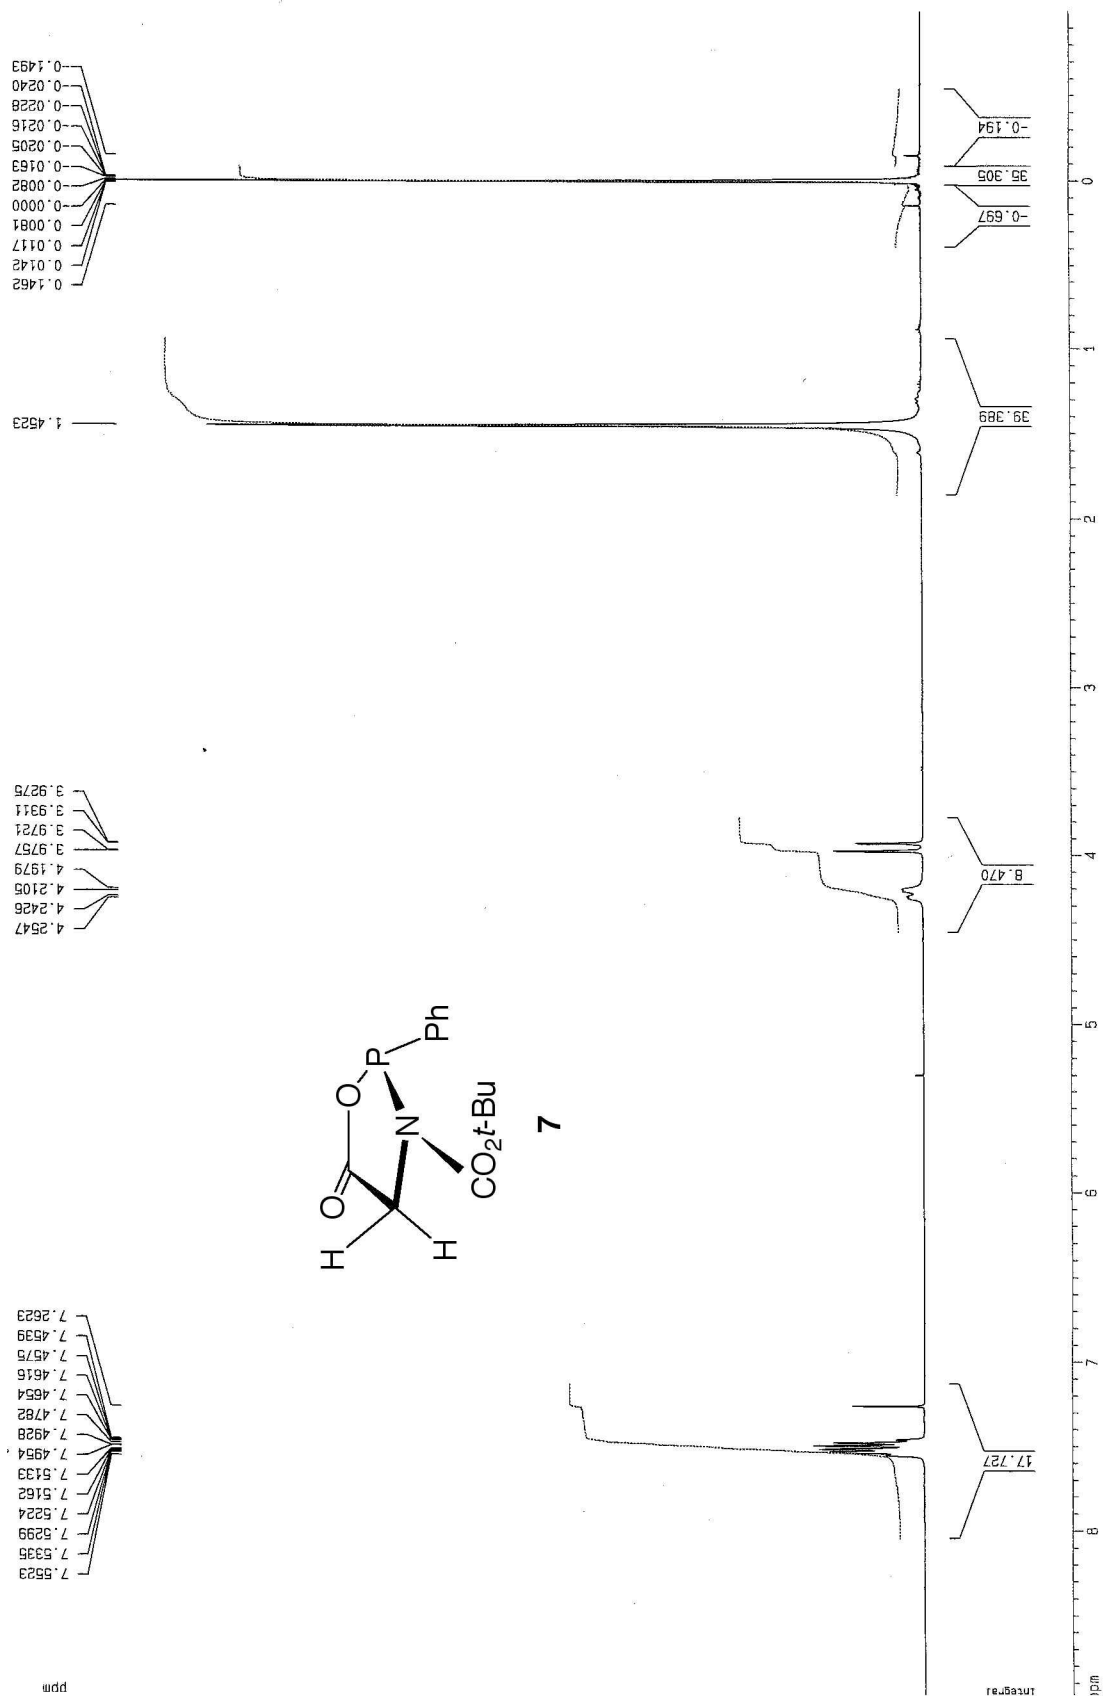

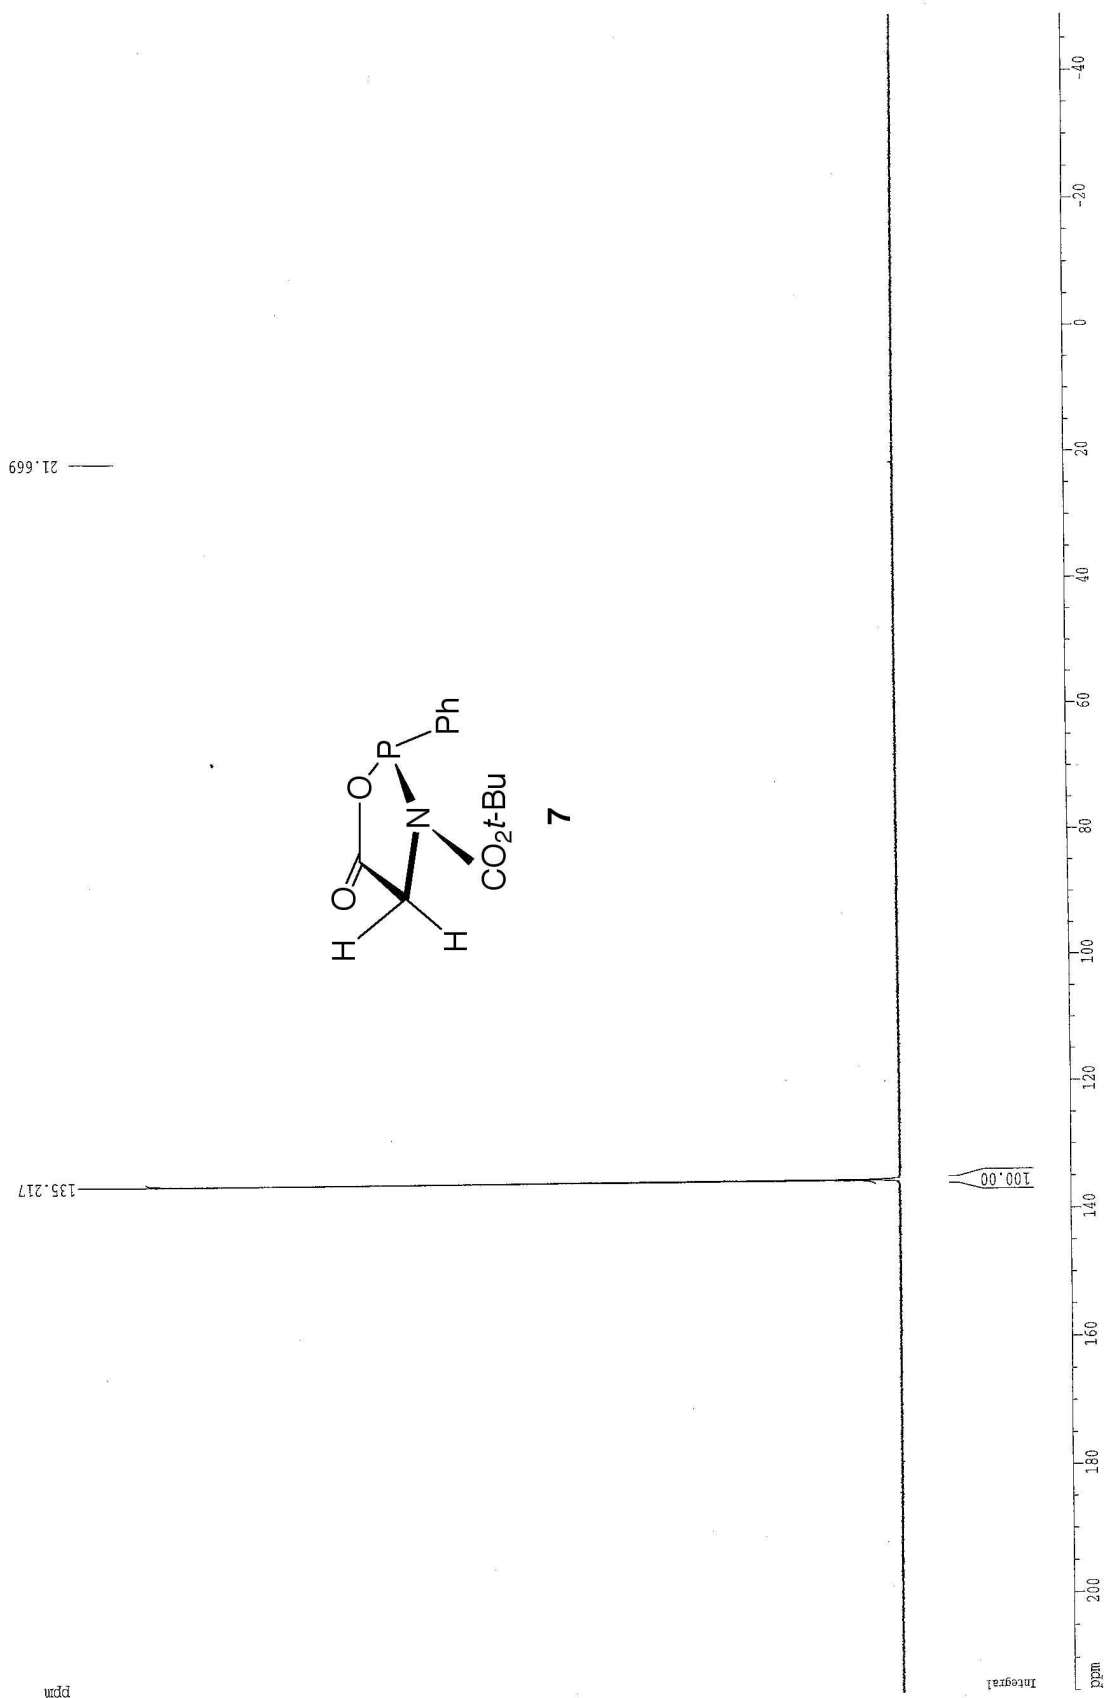

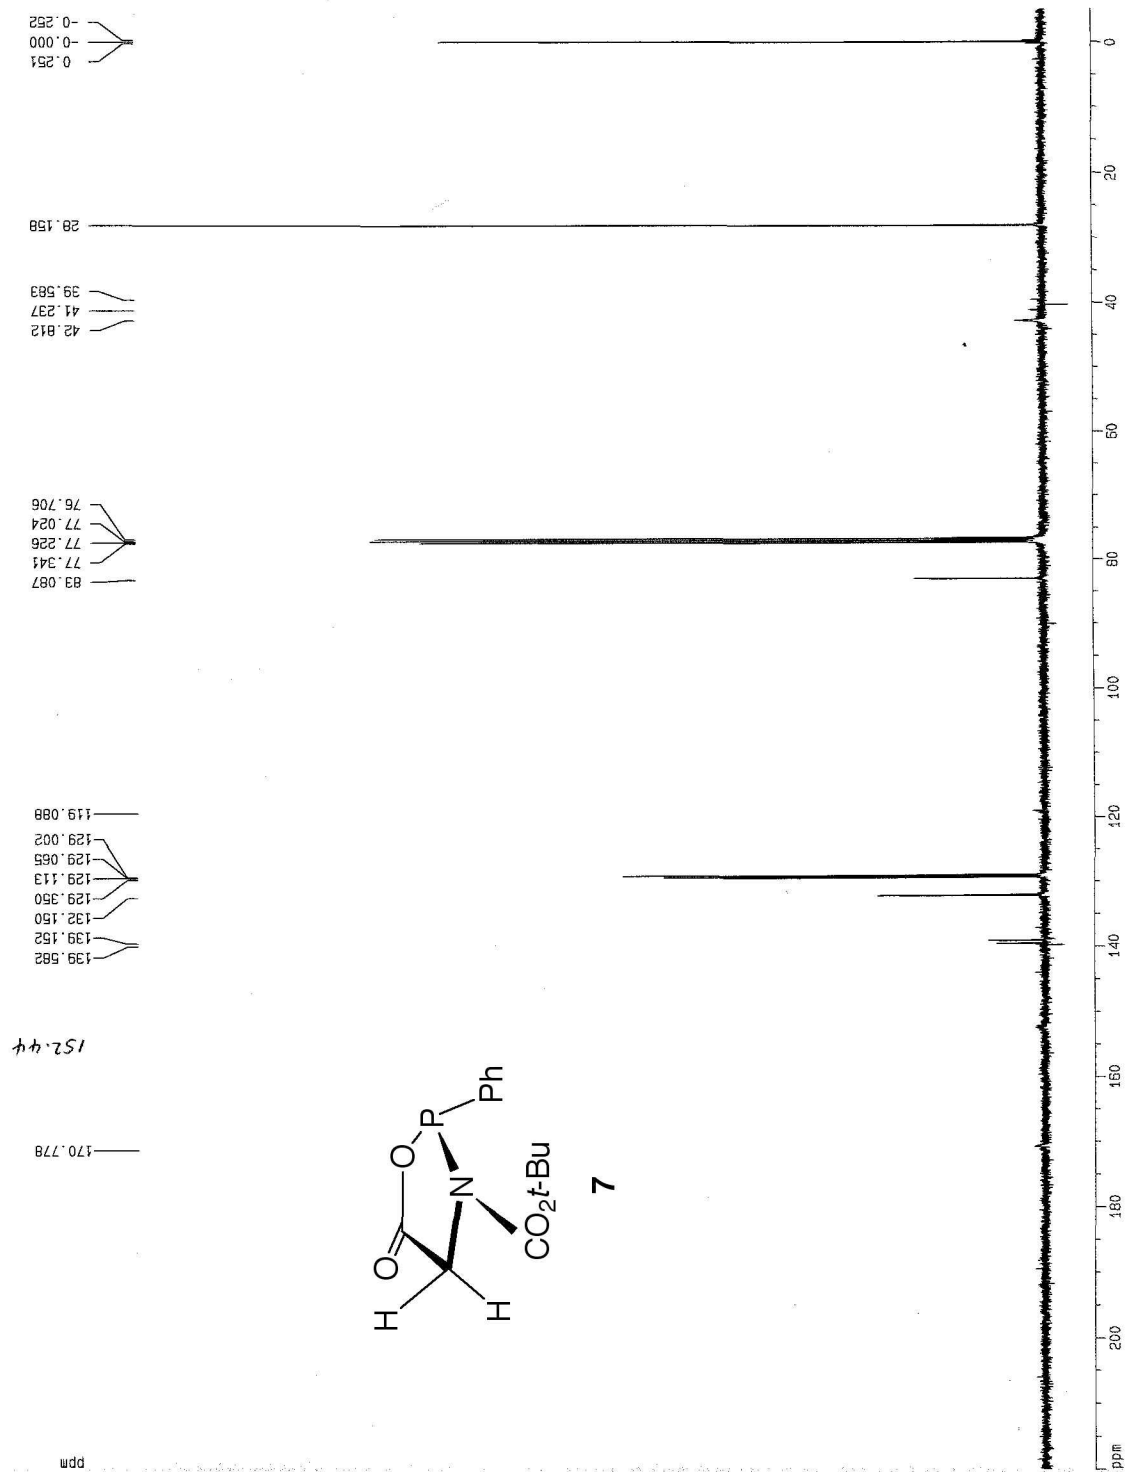

P-E

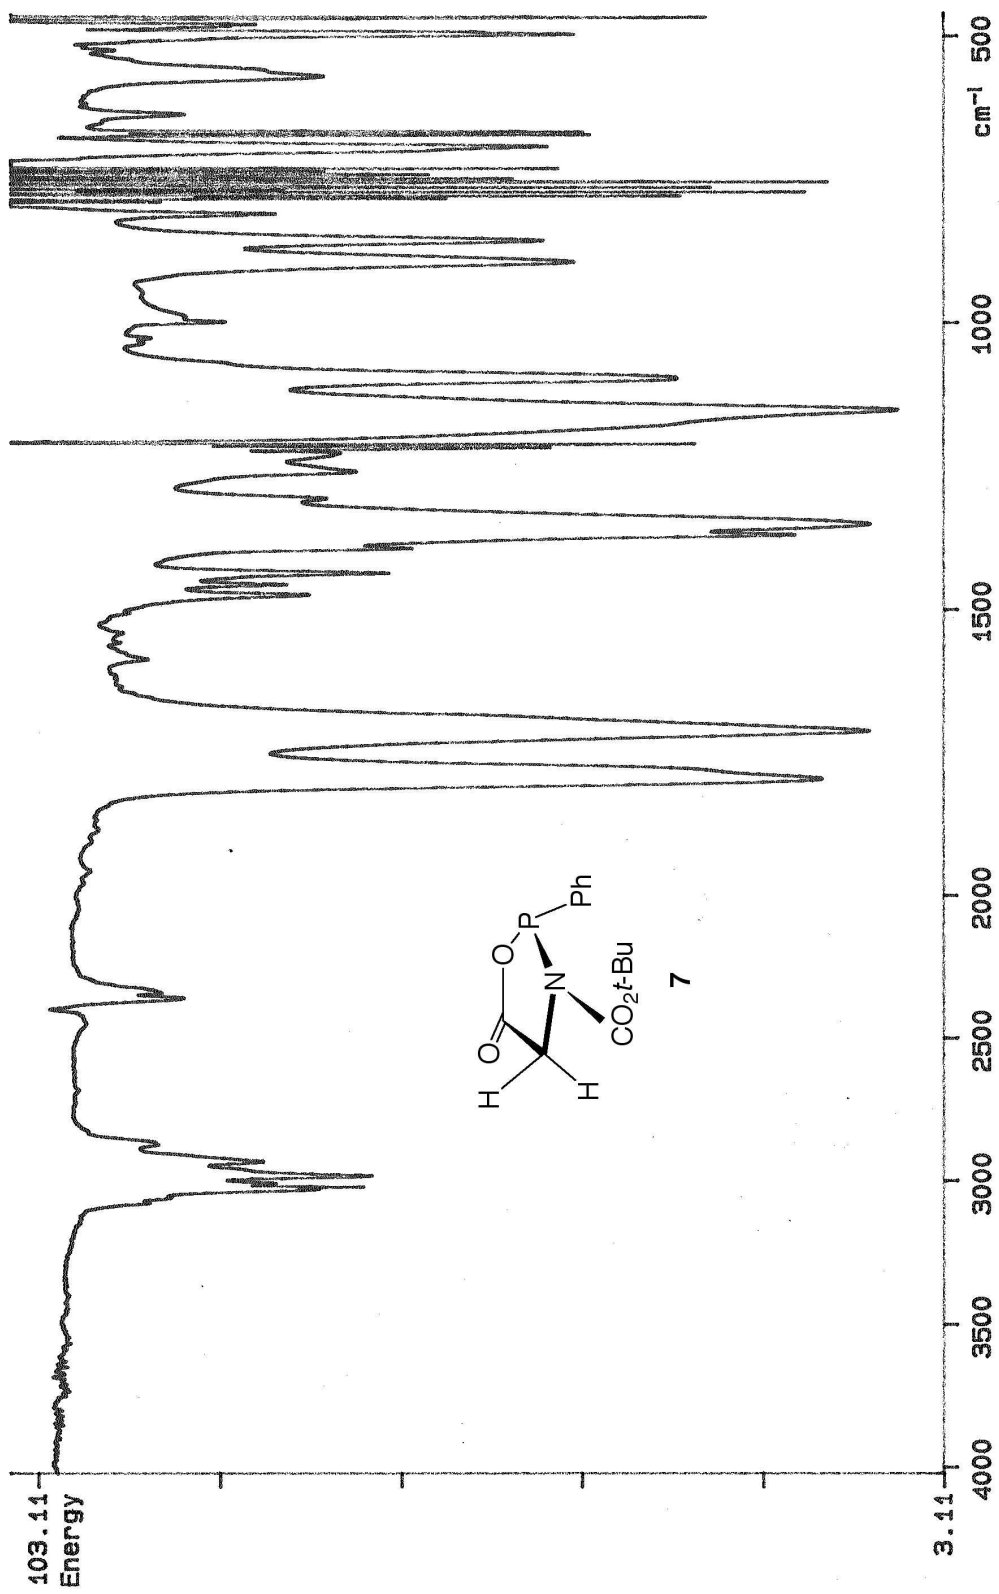

04/01/02 13:23  
Y: 16 scans, 4.0cm⁻¹, single, diff

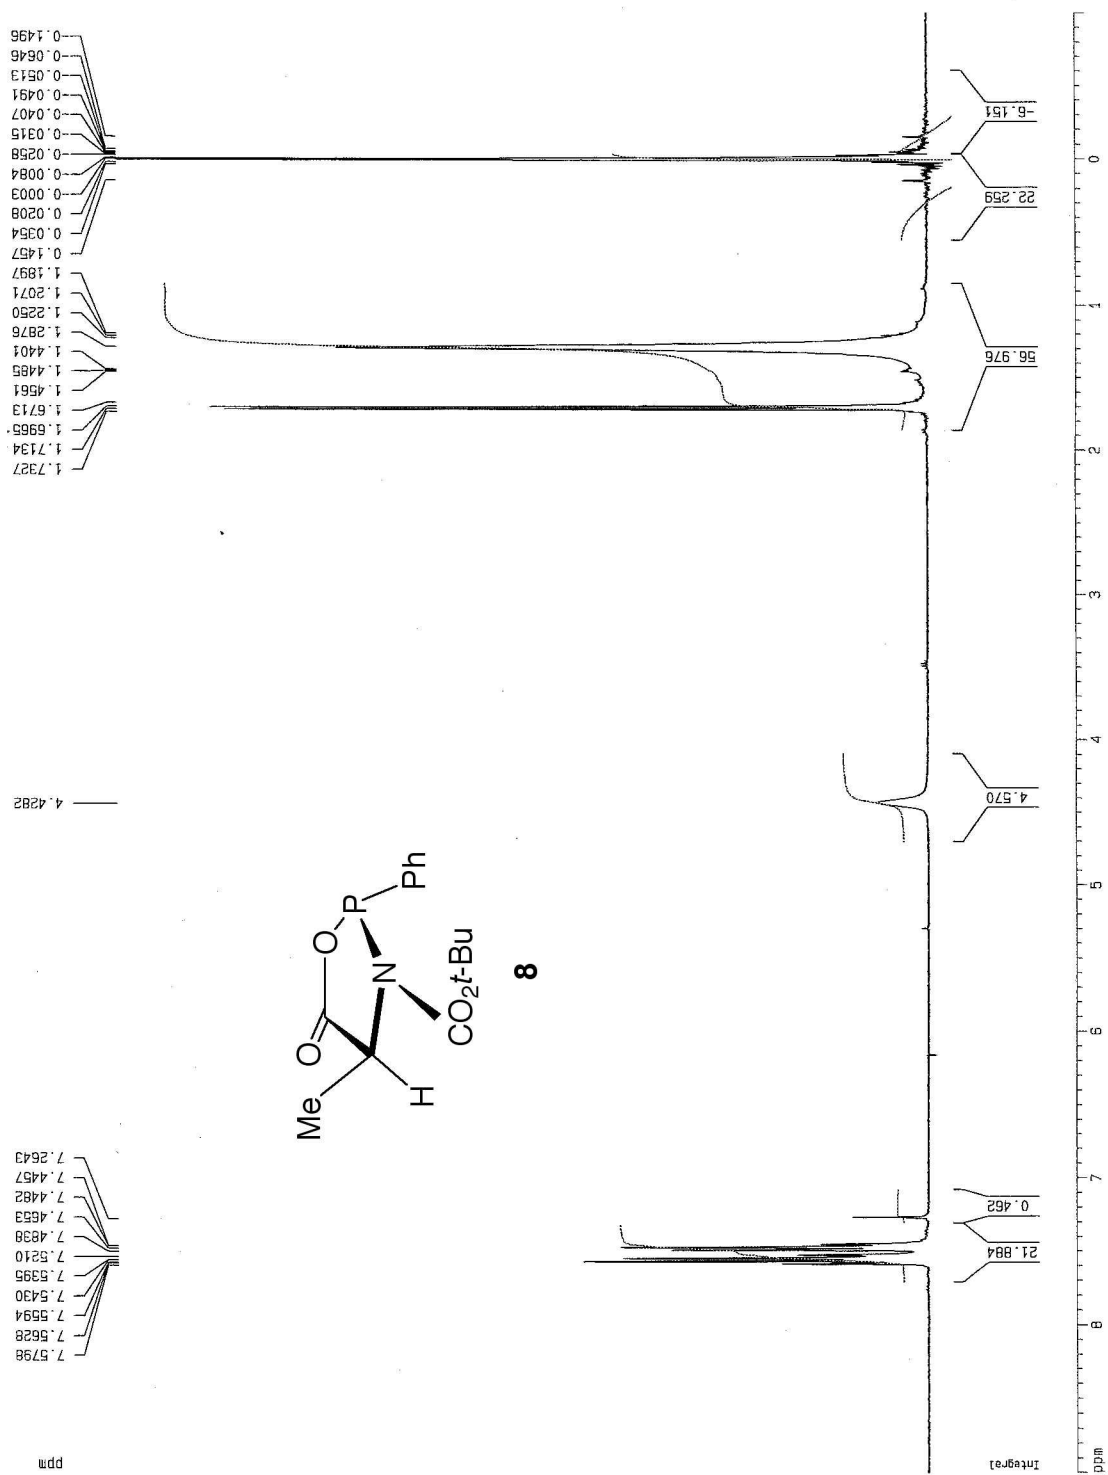



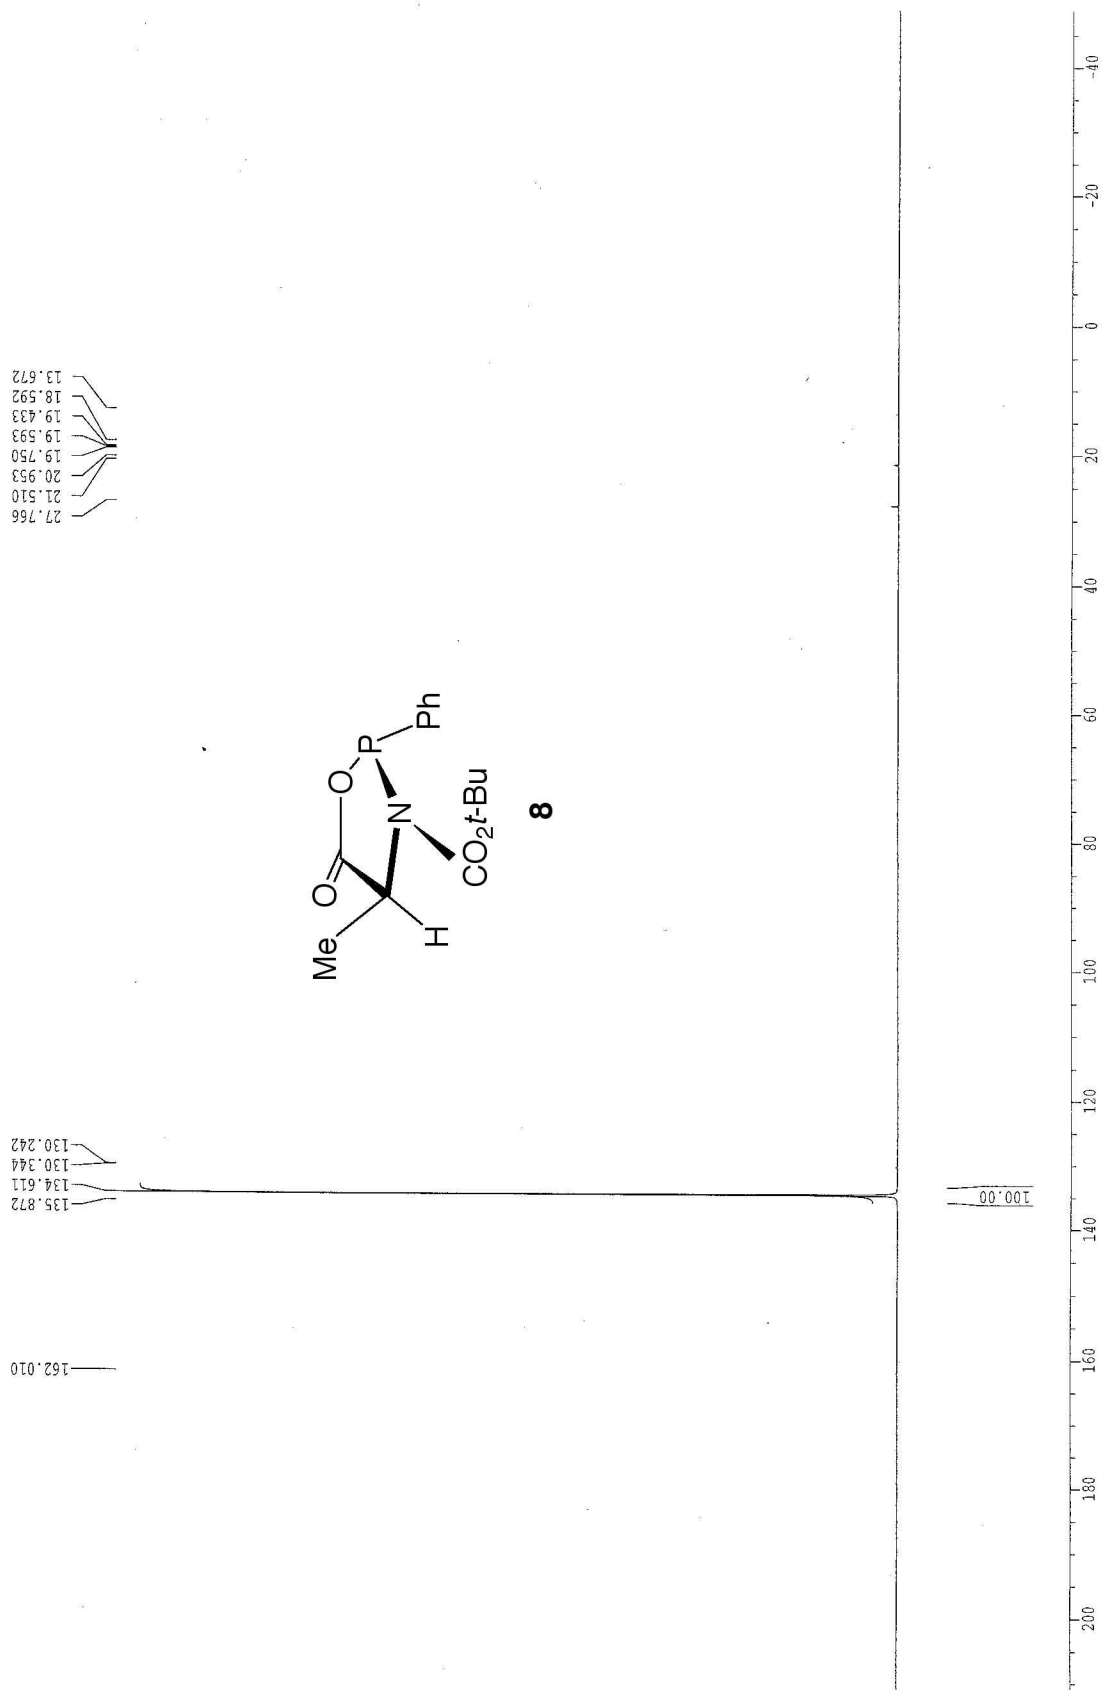

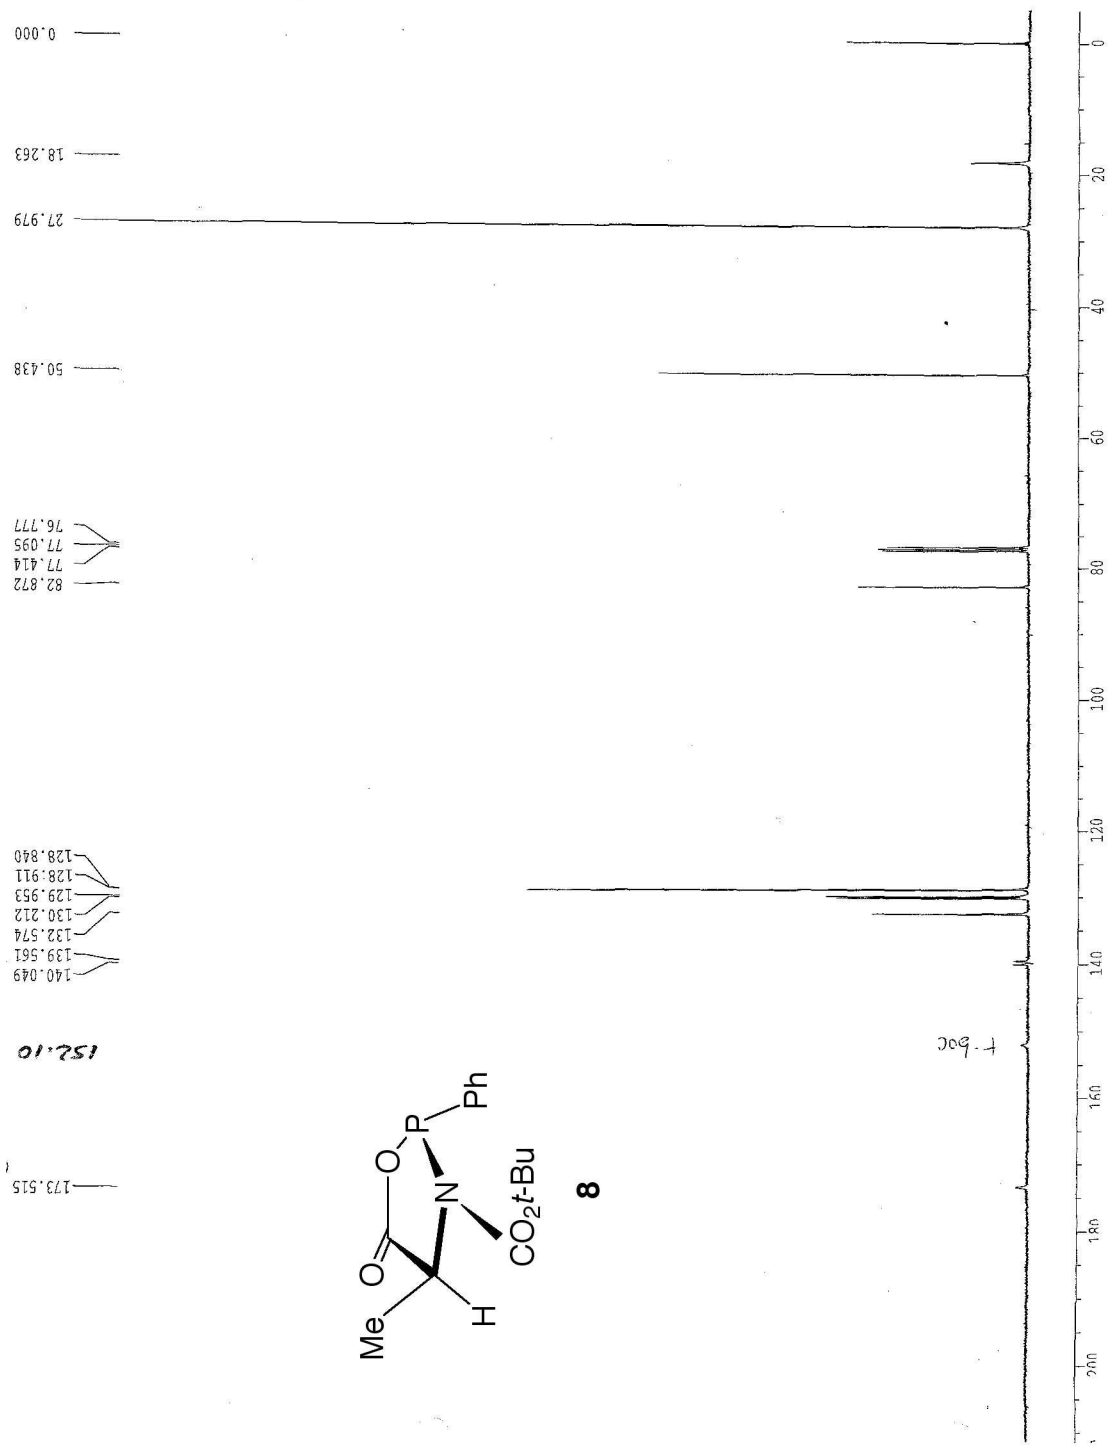

8

P-E

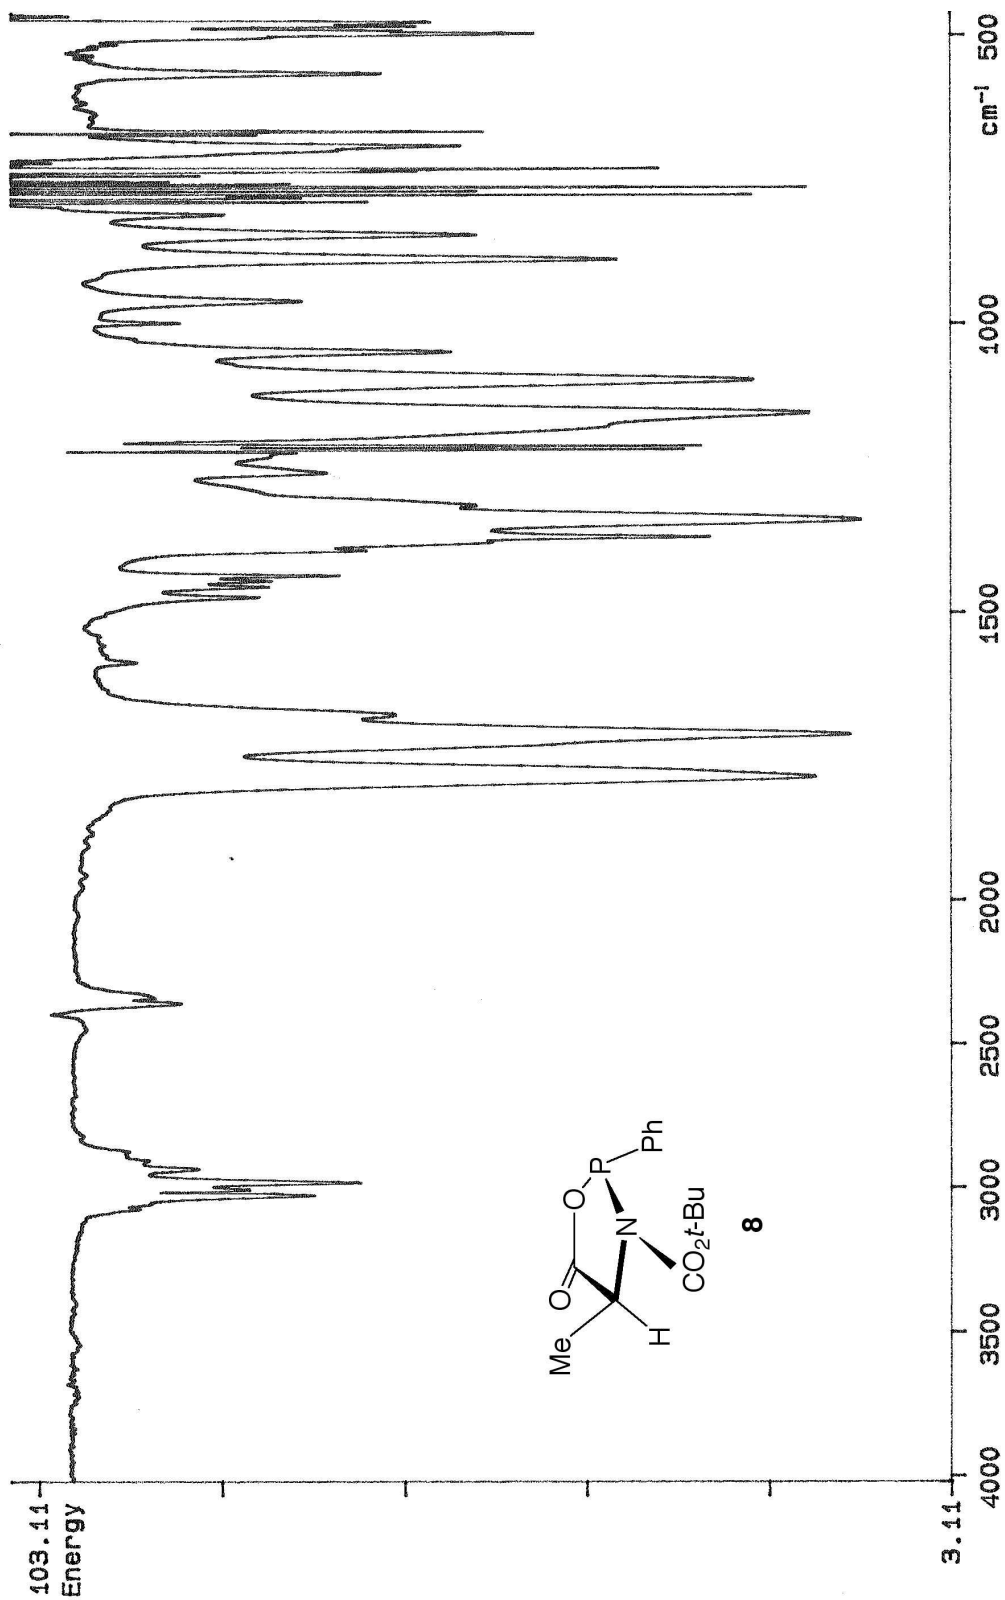

04/01/02 12:11  
Y: 16 scans, 4.0cm-1, single, diff

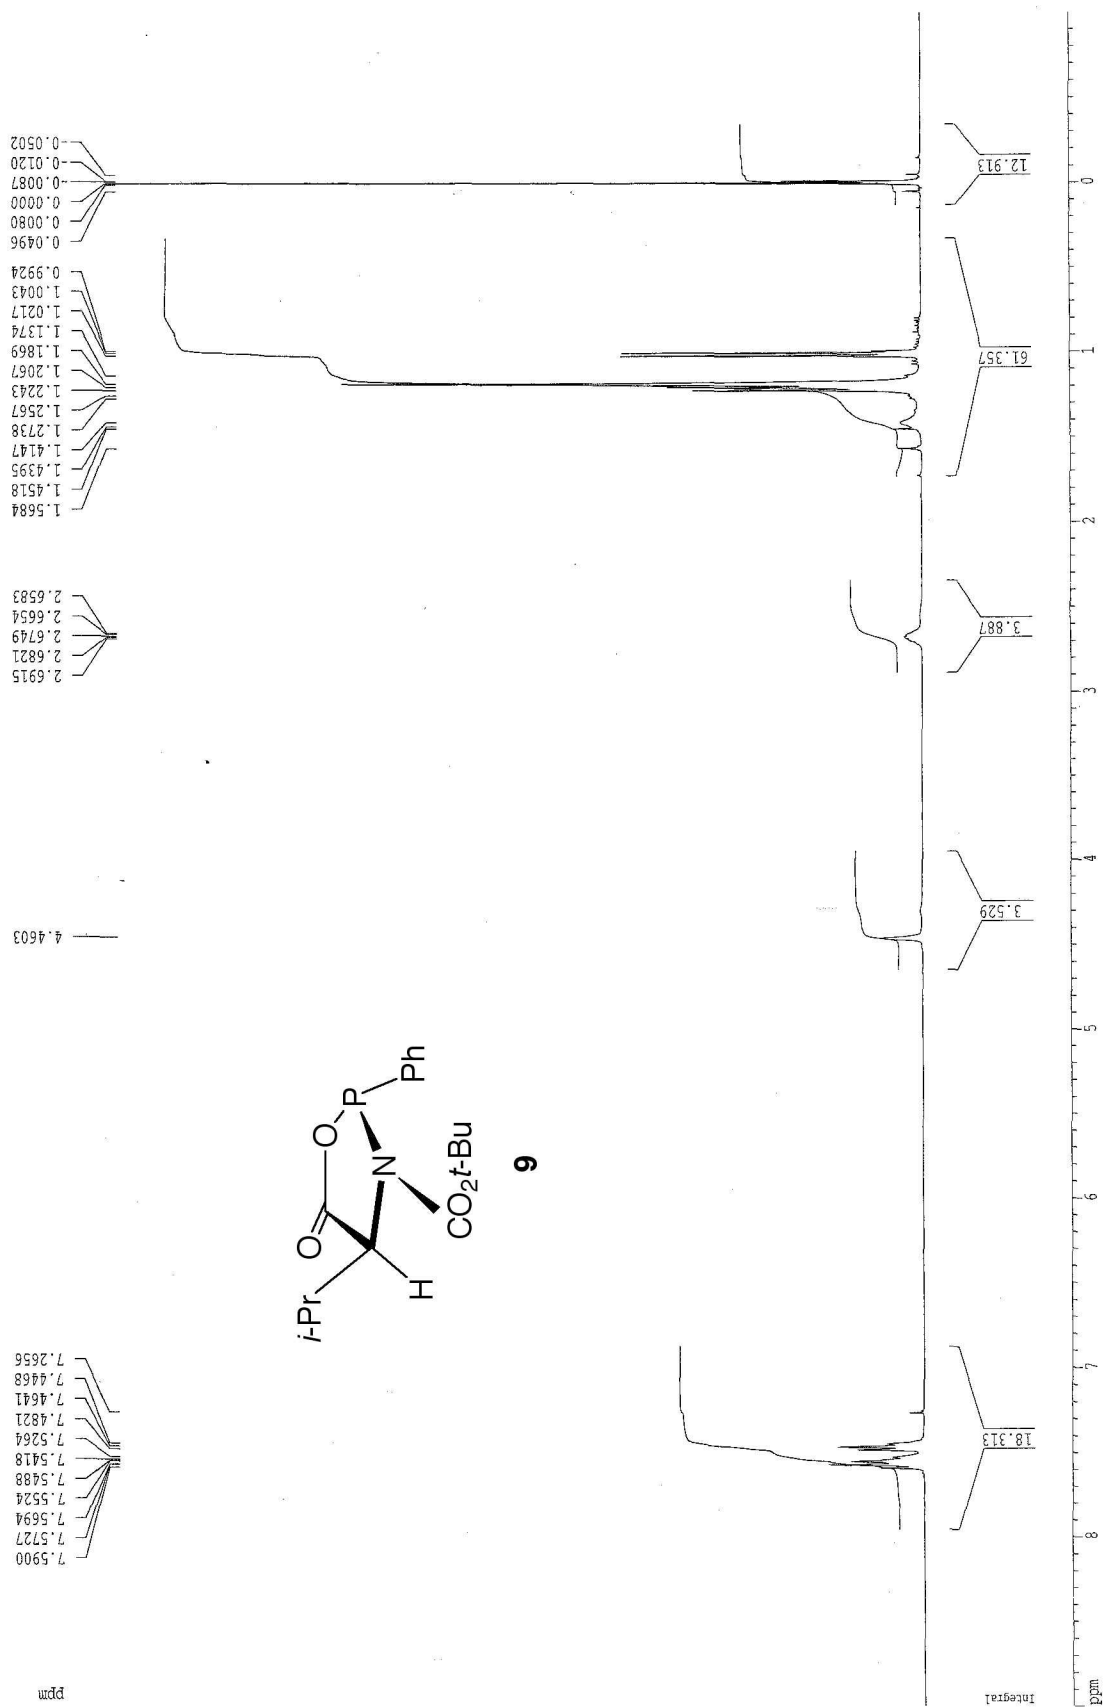

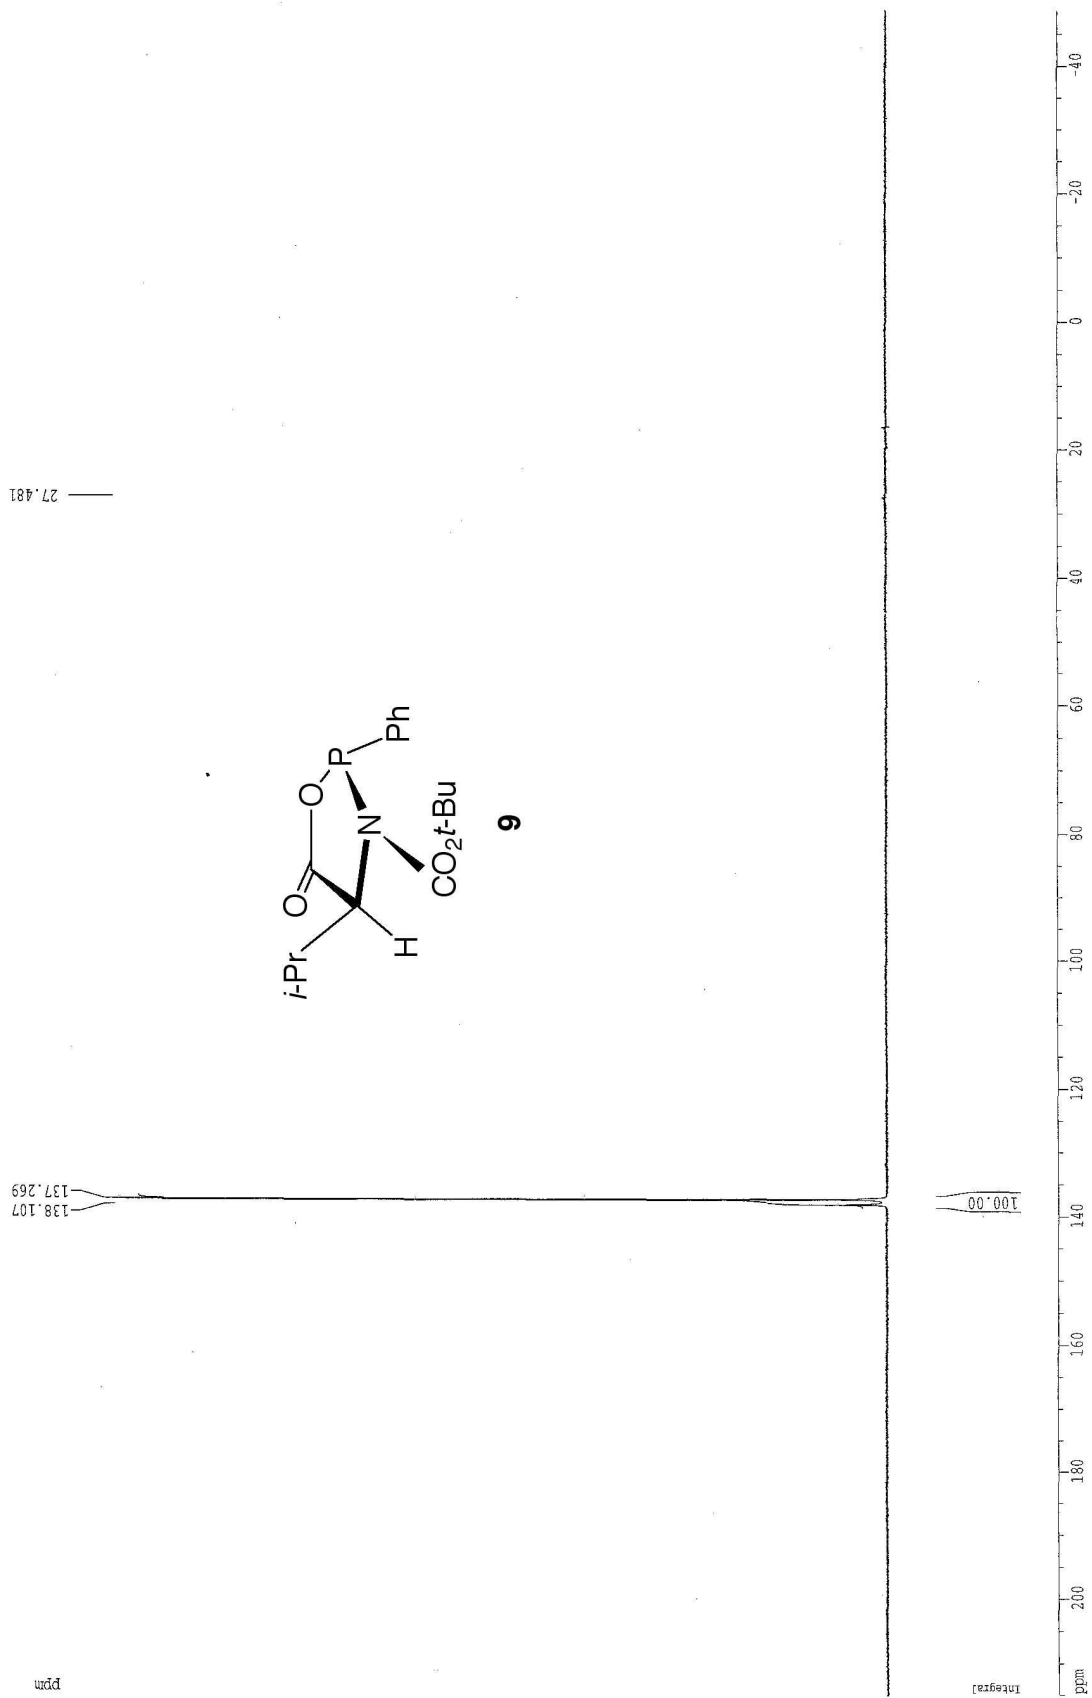

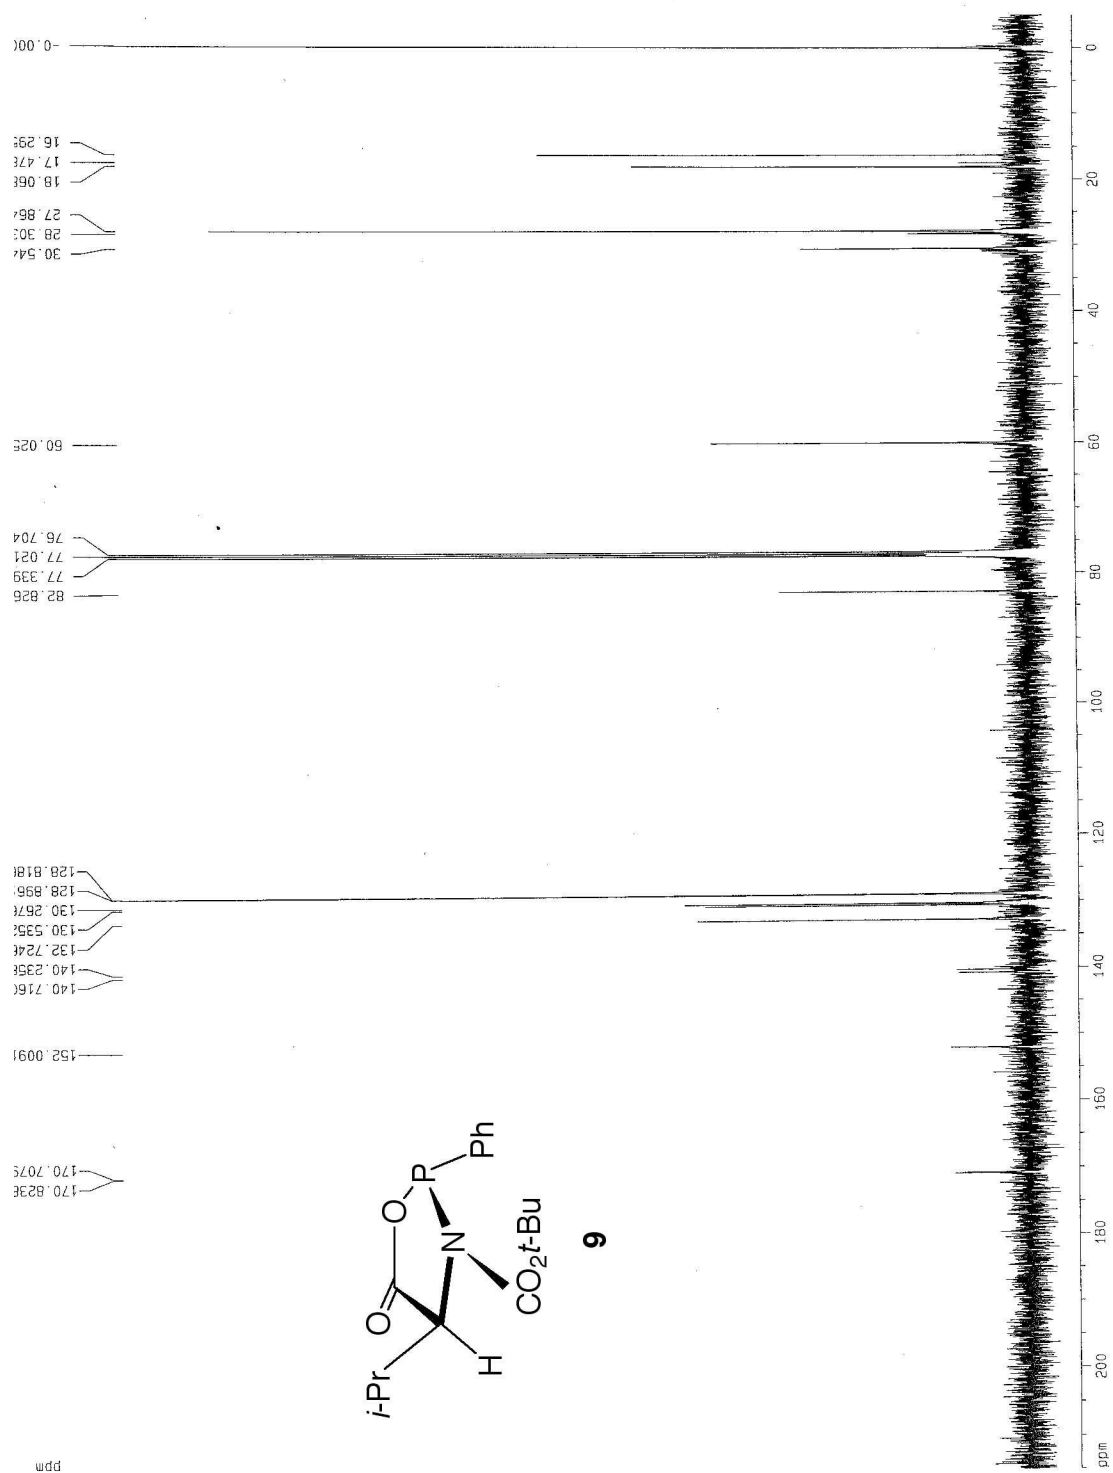

P-E

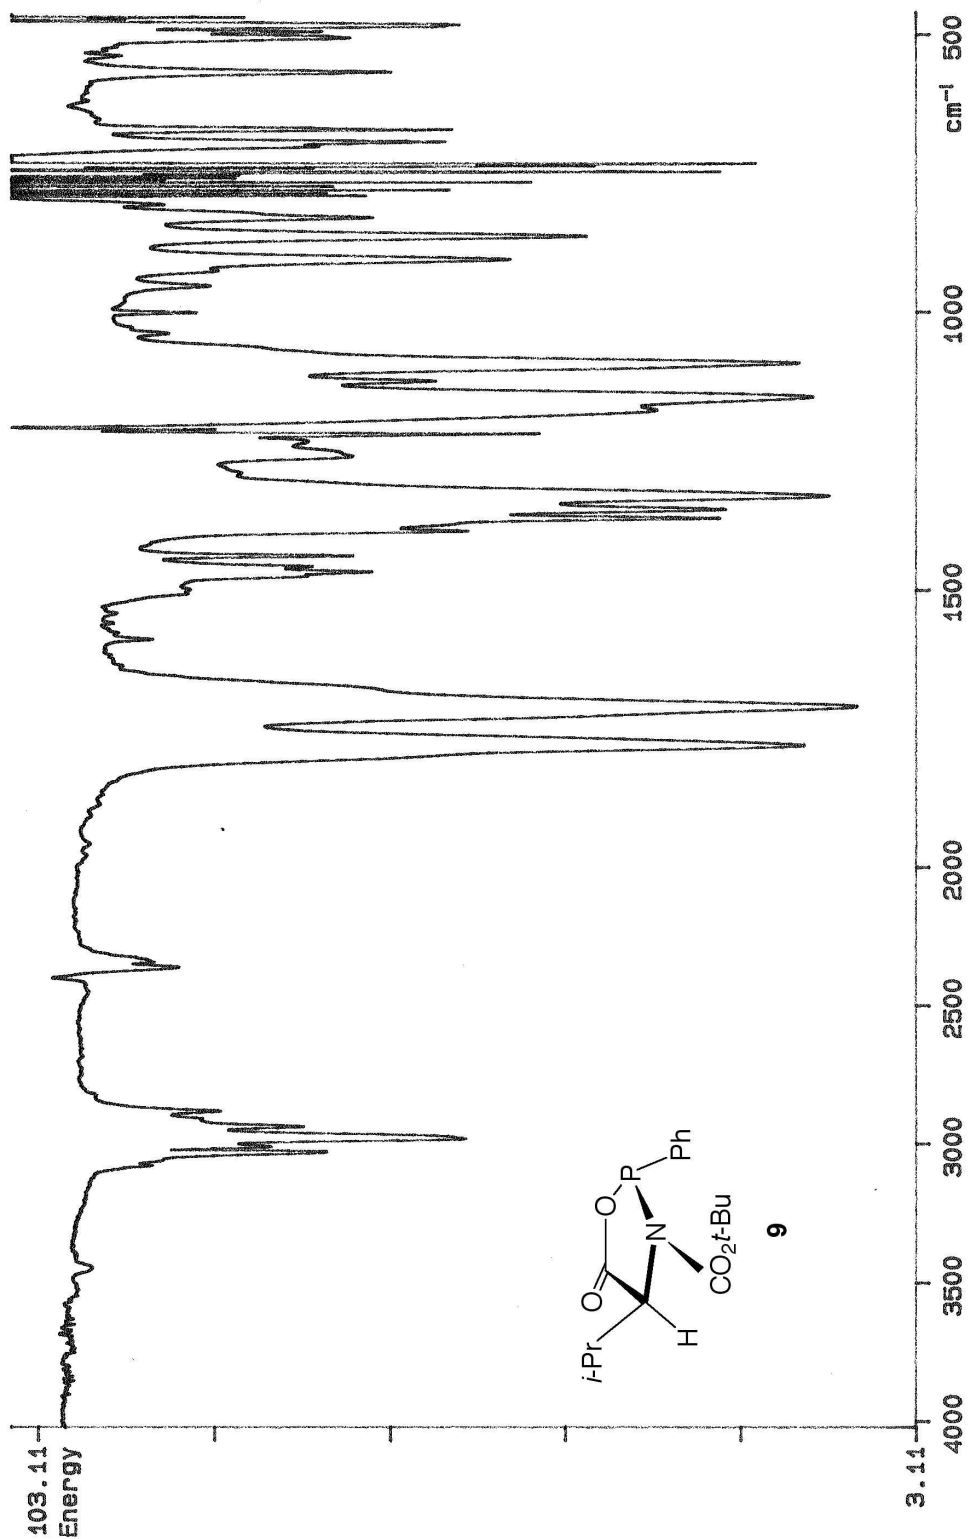

1/2/04  
04/04/02 12:37  
Y: 16 scans, 4.0cm<sup>-1</sup>, single, diff
